**TITLE:** Cryobanking of human distal lung epithelial cells for preservation of their phenotypic and functional characteristics.

**AUTHORS AND AFFILIATIONS:**

Bindu Konda<sup>1,2</sup>, Apoorva Mulay<sup>1,2</sup>, Changfu Yao<sup>1,2</sup>, Edo Israely<sup>1,2</sup>, Stephen Beil<sup>1,2</sup>, Carissa A. Huynh<sup>3</sup>, Warren G. Tourtellotte<sup>3</sup>, Reinaldo Rampolla<sup>2</sup>, Peter Chen<sup>2</sup>, Gianni Carraro<sup>1,2\*</sup>, Barry R. Stripp<sup>1,2\*</sup>

<sup>1</sup>Lung Institute, Department of Medicine, Cedars-Sinai Medical Center, Los Angeles, CA, USA.

<sup>2</sup>Regenerative Medicine Institute, Cedars-Sinai Medical Center, Los Angeles, CA, USA.

<sup>3</sup>Department of Pathology, Cedars-Sinai Medical Center, Los Angeles, Ca, USA.

\*Corresponding authors. [Barry.stripp@csmc.edu](mailto:Barry.stripp@csmc.edu); [Gianni.carraro@csmc.edu](mailto:Gianni.carraro@csmc.edu)

Contact author:

Barry R. Stripp. Ph.D.

8700 Beverly Blvd.

AHSP Room A9317

Cedars-Sinai Medical Center, Los Angeles, CA

Tel: 310-423-1427

[barry.stripp@cshs.org](mailto:barry.stripp@cshs.org)

## **ABSTRACT:**

The epithelium lining airspaces of the human lung is maintained by regional stem cells including basal cells of pseudostratified airways and alveolar type 2 pneumocytes (AT2) of the alveolar gas-exchange region. Despite effective methods for long-term preservation of airway basal cells, methods for efficient preservation of functional epithelial cell types of the distal gas-exchange region are lacking. Here we detail a method for cryobanking of epithelial cells from either mouse or human lung tissue for preservation of their phenotypic and functional characteristics. Flow cytometric profiling, epithelial organoid-forming efficiency, and single cell transcriptomic analysis, were used to compare cells recovered from cryopreserved tissue with those of freshly dissociated tissue. Alveolar type 2 cells within single cell suspensions of enzymatically digested cryobanked distal lung tissue retained expression of the pan-epithelial marker CD326 and the AT2 cell surface antigen recognized by monoclonal antibody HTII-280, allowing antibody-mediated enrichment and downstream analysis. Isolated AT2 cells from cryobanked tissue were comparable with those of freshly dissociated tissue both in their single cell transcriptome and their capacity for in vitro organoid formation in 3D cultures. We conclude that the cryobanking method described herein allows long-term preservation of distal human lung tissue for downstream analysis of lung cell function and molecular phenotype, and is ideally suited for creation of an easily accessible tissue resource for the research community.

**Key Words:** Epithelial progenitor cells, Organoids, Cryopreservation, single-cell RNA sequencing

## INTRODUCTION:

Procurement of fresh lung tissue from both healthy and diseased donors is an integral part of research focused on human lung biology and disease. The expanding repertoire of advanced omics approaches allowing molecular phenotyping of lung cells at single-cell resolution[1-3], coupled with advances in disease modeling using organoid-based three-dimensional culture systems[4-7], has increased demand for this limited tissue resource. Comparisons made between lung cells isolated from either control tissue from donors lacking prior clinical evidence of lung disease, or specimens recovered from patients either through bronchoscopy, biopsy or following transplantation, have yielded novel insights into the cell biology and pathophysiology of the human lung [8-15]. Collection of sufficient biological replicates of fresh tissue is challenging and typically requires establishment of tissue procurement/sharing consortia[16, 17]. In addition, omics studies performed with high biological replicates at the time of tissue procurement results in technical batch effects that must be corrected post-hoc, with associated reductions in data quality and reliability [18]. Accordingly, there is an urgent need to validate efficient methodologies for tissue banking that preserve the molecular phenotype and function of lung cells within valuable donated tissue samples.

More applied applications of primary lung tissue samples include the development of epithelial culture models for optimization of either cell- or gene-based corrective therapies. Cell-based therapies have been adopted for diseases involving a variety of organs and cell types [19-31], and in combination with therapeutic gene correction of long-lived lung epithelial progenitors, may represent a plausible approach for monogenic lung diseases such as cystic fibrosis [32-34]. However, realization of stem cell-based therapeutic approaches for lung regenerative medicine will require development and validation of reproducible protocols allowing standardization and scalability, as has been demonstrated in other tissues [35-38].

Herein, we demonstrate a novel approach for human lung tissue processing and preservation that allows on-demand access to donor tissue samples. We show that tissue dissociation of Cryobanked mouse and human lung tissue samples yield epithelial cell types whose molecular phenotype and functional properties in organoid-based culture models are equivalent to those of freshly dissociated tissue. Application of this method to tissue samples provided by otherwise healthy lung tissue donors, or patients donating explanted tissue for research at the time of transplantation or partial surgical resection, has potential to significantly expand the accessibility of these precious samples for basic and translational research into human lung cell biology and disease.

## **MATERIALS AND METHODS:**

**Animals:** Experiments were performed with pathogen free C57Bl/6 mice in accordance with institutional IACUC approval.

**Human lung samples:** Human lung tissue was obtained from deceased tissue donors in compliance with consent procedures developed by the International Institute for the Advancement of Medicine (IIAM) and approved by the Cedars-Sinai Medical Center Internal Review Board.

Detailed description of the materials and methods are available as an online supplement.

### **Freezing distal regions of the lung.**

Lung tissue was diced into pieces of approximately 1 cm<sup>3</sup> and placed in a 50 mL conical tube, washed to remove blood and epithelial lining fluid, and minced into pieces of approximately 3-4 millimeters in diameter. Between 1 and 1.5 grams of tissue was added to a 2 mL cryovial with 1 mL of CryoStor cryopreservation media. Vials placed in a cell freezing container filled with isopropyl alcohol, were left at -80 °C overnight. The following day, vials were transferred to liquid nitrogen for long-term storage.

Note: The tissue needs to be completely submerged in freezing medium in order to prevent loss of cell viability during the freezing process.

### **Enrichment and subsetting of epithelial progenitor cells from fresh or frozen lung tissue.**

Enrichment and fractionation of small airway and alveolar progenitor cells from distal lung tissue was performed using appropriate cell surface markers, as previously described [39]. Tissue was thawed by placing the vial at 37 °C for 1 min and transferred into a sterile 50 ml tube with 10ml of HBSS and centrifuged at 500 g for 5 min. Tissue was then transferred to a sterile petri dish, finely minced using single sided razor blade, and enzymatically digested using Liberase (0.05 mg/mL), DNase (0.025 mg/mL) for 40-60 min at 37 °C, to obtain a single cell suspension.

NOTE: Incubation time with the enzymes can vary depending on the type or condition of the tissue. For example, enzymatic digestion of normal tissue takes approximately 45 min. However, fibrotic tissue from Idiopathic pulmonary fibrosis samples can require a longer incubation time of up to 60 min. Therefore, monitor tissue carefully during this step.

Depletion of mesenchymal and immune fractions and enrichment of HT II-280<sup>+</sup> cells, was performed as previously described[39, 40].

### **Large scale organoid expansion.**

Organoids were cultured as previously described[39].

Organoids were passaged by washing once with PBS and Matrigel dissolved by the addition of Corning cell recovery solution. Cells were collected in FACS buffer (supplemental data Table 2) and centrifuged at 600 x g for 5 minutes at 4 °C, followed by staining for FACS. Primary antibodies were added at the required concentration to each 1 x 10<sup>7</sup> cells in 1 ml of HBSS+ buffer and incubated for 30 minutes at 4 °C (Table 3). For cultures, 5 x 10<sup>3</sup> enriched epithelial

cells were added to a sterile 1.5 mL tube along with  $7.5 \times 10^4$  MRC-5 cells (human lung fibroblast cell line), cell were centrifuged at  $500 \times g$  for 5 minutes at  $4^\circ\text{C}$ . NOTE: Cell counts determined by FACS must be confirmed by manual counting with a hemocytometer. Cell pellets are resuspended in antibiotic-supplemented media and placed on ice. Next, an equal volume of 1x growth factor depleted basement membrane matrix medium (Matrigel) was added. Samples should be kept on ice to avoid premature polymerization of Matrigel. The cell suspension is then transferred into a 24-well Transwell insert ( $0.4 \mu\text{m}$  pore-size;  $1.4 \times 10^4$  cells/cm<sup>2</sup>) (supplemental data Table 4), taking care not to introduce air bubbles. After incubation at  $37^\circ\text{C}$  for 30-45 minutes, Transwell's are placed in a culture plate containing 600  $\mu\text{L}$  of pre-warmed growth medium.

NOTE: Antimycotic agents ( $1\mu\text{g/ml}$ ) and Gentamicin ( $50\mu\text{g/ml}$ ) should be included in culture media for the first 24 hours, and  $10 \mu\text{M}$  Rho kinase inhibitor added for the first 72 hours after initial plating. Cultures should be kept at  $37^\circ\text{C}$  in a 5%  $\text{CO}_2$  incubator for up to 30 days, during which time the media should be changed every 48 h.

### **Isolation of cells from Mouse Lung.**

See supplemental methods.

### **Single cell RNA sequencing**

Single cells were captured from FACS-enriched epithelial fractions ( $\text{CD45}^-$ ,  $\text{CD31}^-$ ,  $\text{CD326}^+$ ) of fresh and frozen tissue using the 10x Chromium platform and used for the generation of scRNA-Seq libraries according to the manufacturer's instructions (10X Genomics). Briefly, cell suspensions were loaded on a Chromium Controller instrument (10X Genomics) to generate single-cell Gel Bead-In-Emulsions (GEMs). Reverse transcription (RT) was performed in a Veriti 96-well thermal cycler. Barcoded sequencing libraries were quantified by quantitative PCR using the KAPA Library Quantification Kit (KAPA Biosystems, Wilmington, MA), and sequencing performed on a NovaSeq 6000 (Illumina). Cell Ranger software (10X Genomics) was used for mapping and barcode filtering. Briefly, the raw reads were aligned to the transcriptome using STAR(5), using a hg38 transcriptome reference from Ensemble 93 annotation. Expression counts for each gene in all samples were collapsed and normalized to unique molecular identifier (UMI) counts. Data analysis was performed with Conos, a tool developed for joint analysis of heterogeneous datasets.

## RESULTS:

### **Mouse lung Epcam<sup>+</sup> cell fractionation comparison fresh tissue Vs frozen tissue Vs frozen cells:**

Using a newly devised experimental approach (Fig. 1A-E), we have optimized the extraction of cryopreserved epithelial progenitor cells from human and mouse lung. In this workflow, lung tissue is enzymatically digested using a combination of Liberase and Dispase. Immune (CD45<sup>+</sup>) and endothelial (CD31<sup>+</sup>) cells are then removed using magnetic beads. Finally, using specific epithelial surface markers, cells undergo FACS isolation, before being processed for downstream applications.

FACS analysis was performed on the following samples - cells freshly isolated from the mouse lungs (Fig. 2A), cells isolated from Cryobanked minced mouse lung tissue (Fig. 2B), and Cryobanked single cell suspensions of enzymatically dissociated mouse lung tissue (Fig. 2C). For all conditions, epithelial cells were identified based on exclusion of CD31<sup>+</sup> endothelial cells and CD45<sup>+</sup> immune/hematopoietic cells, followed by positive selection for CD326 (EpCAM). Comparable distributions of CD326<sup>+</sup> populations were observed between all samples (Fig. 2A-C; Supp. Fig. 1). Similarly, no significant differences were observed viability of epithelial cells isolated from either fresh (83.53% +/-1.27 %) or Cryobanked (85.00% +/-2.42%) mouse lung tissue (Fig. 2D). However, Cryobanked single cell suspensions of dissociated mouse lung tissue showed a significant reduction in viability compared with either fresh or Cryobanked tissue ( $p = 0.0008$  and  $0.0013$ , respectively). Colony forming efficiency showed no significant differences between epithelial cells isolated from fresh (7.7% +/- 0.9%) or Cryobanked (8.2% +/-1%) tissue but was significantly lower among epithelial cells isolated from Cryobanked single cell suspensions of dissociated mouse lung tissue when compared with either fresh or Cryobanked samples ( $p = 0.0089$  and  $0.0007$ , respectively; Fig. 2E).

### **Human distal lung cell fractionation comparison fresh tissue Vs frozen tissue Vs frozen cells:**

Epithelial cells were FACS enriched following enzymatic dissociation of either freshly obtained lung tissue from cadaveric donors ("Distal fresh tissue", Fig. 3A), or Cryobanked minced tissue ("Distal cryobanked tissue", Fig. 3B), or from Cryobanked single cell suspensions of enzymatically dissociated tissue ("Distal cryobanked cells", Fig. 3C). Non-epithelial cell types including immune cells, red blood cells and endothelial cells were depleted from the total pool of lung cells by staining magnetic bead-conjugated antibodies to CD45, CD235a and CD31, respectively. Further FACS depletion of cells staining for either CD45, CD235a and CD31, elimination of dead cells staining for DAPI, and positive selection for the pan-epithelial cell marker CD326, led to highly enriched epithelial cell fraction. Epithelial cells were further subdivided based upon their staining with the AT2-specific monoclonal antibody, HTII-280[41]. Comparable distribution of CD326<sup>+</sup> populations were observed between all samples (Fig. 3A-C; Supp. Fig. 2). Similarly, no significant differences were observed viability of epithelial cells isolated from either fresh (86% +/- 6.8%) or frozen (85% +/- 5.8%) human lung tissue (Fig. 3D). HTII 280<sup>+</sup> cultures formed rapidly expanding organoids, with an average CFE of 10% in both

fresh and frozen distal tissue. Colony-forming efficiency was not significantly different between HTII-280+ cells isolated from fresh (10.7% +/- 2%) and frozen (9.9% +/- 2.8%) human lung tissue (Fig. 3E). In contrast, colony-forming efficiency of HTII-280+ cells isolated from cryobanked single cell suspensions was significantly lower when compared to either fresh (10.7% +/- 2%) or cryobanked tissue (9.9% +/- 2.8% and 7.2% +/- 0.8%, respectively) (Fig. 3E). Distal lung epithelial organoids from fresh tissue (Fig. 3A), frozen tissue (Fig. 3B) and frozen cells (Fig. 3C) were cultured with growth-factor depleted Matrigel in Pneumacult ALI medium. Morphology and immunophenotypic characteristics were equivalent between organoids derived from HTII-280+ cells isolated from either fresh, Cryobanked tissue or Cryobanked single cell suspensions.

**Transcriptomic comparison of datasets derived from freshly isolated and frozen tissue:**

Single cell RNA sequencing was performed to determine the quality of transcriptomic data generated from isolated lung epithelial cells prepared from fresh versus cryobanked lung tissue. Analysis of sequencing quality showed comparable metrics, including sequencing saturation, number of reads mapped to exons, and number of genes per cell (Table 1). Following quality control and filtering, 'fresh' and 'cryobanked' datasets showed similar representation of transcripts, UMIs, and percentage of mitochondrial genes. Projection of transcript levels for major cell type-specific genes reveal similar cell type-specific profiles among data generated from either fresh or cryobanked tissue samples (Fig. 4B-H). These data suggest that cryobanked tissue samples shown remarkable preservation of transcriptomes of isolated epithelial cell types following recovery and tissue dissociation, relative to their freshly processed tissue counterparts. We conclude that the tissue cryobanking protocol described herein will enable sample banking for simultaneous processing and acquisition of single cell omics data.

## DISCUSSION:

We describe and validate a method for cryopreservation of either mouse or human lung tissue. Epithelial cells isolated from enzymatically dissociated cryobanked tissue retain molecular and functional properties that are equivalent to those of freshly dissociated lung tissue. We have successfully applied this method to tissue from “otherwise healthy” control tissue donors, and explant tissue donated by patients undergoing transplantation for either IPF or CF [8-12, 15]. Critical elements of this method include the ease of processing and banking large quantities of tissue, comparable representation of distal lung cell types between cryobanked and fresh tissue samples, preservation of surface epitopes allowing antibody-mediated enrichment of defined cell types, and similar viability of epithelial cells isolated from cryobanked samples to those isolated from fresh tissue.

Epithelial cells recovered from cryobanked tissue maintained the ability to form three-dimensional organoids in culture with an efficiency comparable to epithelial cells isolated from dissociated freshly obtained tissue. Furthermore, single cell RNA sequencing of epithelial cells isolated from cryobanked human lung tissue revealed similar levels of cellular heterogeneity to that seen among epithelial cells isolated from fresh tissue specimens. This held true even for fragile epithelial cell types such as type I pneumocytes and ciliated cells. This is a significant practical advancement as it allows storage of normal and diseased lung tissue based on availability and allows for simultaneous processing of multiple samples for single cell RNA sequencing.

An important benefit of cryobanking multiple patient samples for later simultaneous processing for single cell transcriptomic analysis is the ability to minimize technical variability that contributes to sample batch effects. Comparison of ‘healthy’ and diseased specimens have produced novel description of pathological conditions with unprecedented resolution[8-10]. Collection and processing of large amount of freshly isolated tissue is challenging and often relegated to ad-hoc consortia[16, 17]. In addition, analysis of datasets generated from different institutions, often using laboratory-specific protocols for sample processing, increase the need bioinformatic correction of data to minimize confounding batch effects. While computational method for batch effect correction are available, the ever-growing list of available packages and approaches reflect that technical challenges associated with their application, the principal caveat being that batch effect removal is frequently associated with data degradation and loss of significant biological differences. Cryopreservation has been shown in other organ systems to allow serial sample collection with simultaneous tissue processing to minimize technical batch effects [18]. Here we developed and validated a method that is specific for the lung, including distal epithelium, allowing sample collection, and sharing between remote laboratories for simultaneous processing to guarantee uniformity for omics analyses.

In summary, newly developed methods described herein allow standardization of tissue procurement and experimental planning that are important requirements for development of uniform culture methodologies, screening assays, as well as for assessment of potential



applications for lung regenerative medicine. These methods provide a tool for large-scale banking of valuable lung tissue samples for sharing within the research community.

**Acknowledgments:**

We acknowledge support from the Applied Genomics, AHSP/RMI Flow Cytometry, and Biobank cores at Cedars Sinai Medical Center (CSMC). This research was supported by grants from the National Institutes of Health (NIH) (R01 HL135163; P01 HL108793), the Cystic Fibrosis Foundation (STRIPP20XXO, CARRAR19G0), the Bristol Myers Squibb IDEAL consortium, and by the Bram and Elain Goldsmith Chair in Gene Therapeutics Research.

**Author contributions:**

Conceptualization, B.K, G.C, B.R.S.; methodology, B.K., G.C., C.Y., E. I., B.R.S.; tissue procurement, C.A.H., W.G.T., P.C., R.R., S.B.; data analysis B.K, G.C, B.R.S.; writing, B.K, G.C, B.R.S.; funding acquisition, B.R.S.

**Declaration of interests:**

No competing interests.

## FIGURE LEGENDS:

### **Figure 1: Workflow for isolation of epithelial fraction from human and mouse lung.**

Cryobanked lung tissue can be used to retrieve single cells by enzymatic dissociation. The epithelial fraction is then obtained by a two steps process involving depletion of immune and endothelial cells with magnetic bead conjugated antibodies, and Fluorescence Activated Cell Sorting with specific epithelial markers.

### **Figure 2: Evaluation of mouse epithelial cell fraction.**

Representative flow cytometry dot plots of CD31<sup>-</sup>/CD45<sup>-</sup>/CD326<sup>+</sup> epithelial cells and corresponding 3D organoid cultures from freshly isolated tissue (A), cryobanked tissue (B), or cryobanked single cell suspension (C) of mouse lung (Scale bar = 50  $\mu$ m). Cell viability (D) P \*\* = 0.001, P \*\*\* = 0.008, and epithelial colony forming efficiency (E) P \*\* = 0.008, P \*\*\* = 0.0007 (n = 3 biological replicates). Error bars represent Standard Deviation and significance determined by unpaired t test.

### **Figure 3: Evaluation of human epithelial cell fraction.**

Representative flow cytometry dot plots of CD31<sup>-</sup>/CD45<sup>-</sup>/CD326<sup>+</sup>/HTII-280<sup>+</sup> epithelial cells and corresponding 3D organoid cultures, and immunoreactivity to HTII-280 are shown for freshly isolated tissue (A), cryobanked tissue (B), or cryobanked single cell suspension (C) of human lung (scale bar = 50  $\mu$ m). Cell viability (D), and epithelial colony forming efficiency (E) P \* = 0.04, P \*\*\* = 0.003 (n = 3 biological replicates). Error bars represent Standard Deviation and significance determined by unpaired t test.

### **Figure 4: Transcriptomic profiling of fresh and frozen human distal lung tissue.**

(A) Evaluation of number of transcripts, Unique Molecular Identifiers (UMI), and percentage of mitochondrial genes, in datasets derived from fresh and frozen tissue, visualized by violin plots. Red arrows indicate the presence of a group of cells with low reads for transcripts and UMIs in the 'frozen' dataset. (B) Dimensional reduction of data generated from freshly isolated Fresh and Frozen tissue, visualized by UMAP, with cells colored by subset as shown in key. (C-H) Expression of cell-type specific transcripts, divided by 'fresh' and 'frozen' datasets, visualized by UMAP.

## REFERENCES:

1. Travaglini, K.J., et al., *A molecular cell atlas of the human lung from single-cell RNA sequencing*. Nature, 2020. **587**(7835).
2. McCauley, K.B., et al., *Single-Cell Transcriptomic Profiling of Pluripotent Stem Cell-Derived SCGB3A2+Airway Epithelium*. Stem Cell Reports, 2018. **10**(5): p. 1579-1595.
3. Mizikova, I. and B. Thebaud, *Looking at the developing lung in single-cell resolution*. American Journal of Physiology-Lung Cellular and Molecular Physiology, 2021. **320**(5): p. L680-L687.
4. Nadkarni, R.R., S. Abed, and J.S. Draper, *Organoids as a model system for studying human lung development and disease*. Biochemical and Biophysical Research Communications, 2016. **473**(3): p. 675-682.
5. Langhans, S.A., *Three-Dimensional in Vitro Cell Culture Models in Drug Discovery and Drug Repositioning*. Frontiers in Pharmacology, 2018. **9**.
6. Fang, Y. and R.M. Eglén, *Three-Dimensional Cell Cultures in Drug Discovery and Development*. Slas Discovery, 2017. **22**(5): p. 456-472.
7. Brajsa, K., et al., *Three-dimensional cell cultures as a new tool in drug discovery*. Periodicum Biologorum, 2016. **118**(1): p. 59-65.
8. Reyfman, P.A., et al., *Single-Cell Transcriptomic Analysis of Human Lung Provides Insights into the Pathobiology of Pulmonary Fibrosis*. American Journal of Respiratory and Critical Care Medicine, 2019. **199**(12): p. 1517-1536.
9. Adams, T.S., et al., *Single-cell RNA-seq reveals ectopic and aberrant lung-resident cell populations in idiopathic pulmonary fibrosis*. Science Advances, 2020. **6**(28).
10. Wang, A., et al., *Single-cell multiomic profiling of human lungs reveals cell-type-specific and age-dynamic control of SARS-CoV2 host genes*. Elife, 2020. **9**.
11. Xu, Y., et al., *Single-cell RNA sequencing identifies diverse roles of epithelial cells in idiopathic pulmonary fibrosis*. JCI Insight, 2016. **1**(20): p. e90558.
12. Carraro, G., et al., *Transcriptional analysis of cystic fibrosis airways at single-cell resolution reveals altered epithelial cell states and composition*. Nat Med, 2021. **27**(5): p. 806-814.
13. Carraro, G., et al., *Single-Cell Reconstruction of Human Basal Cell Diversity in Normal and Idiopathic Pulmonary Fibrosis Lungs*. Am J Respir Crit Care Med, 2020. **202**(11): p. 1540-1550.
14. Habermann, A.C., et al., *Single-cell RNA sequencing reveals profibrotic roles of distinct epithelial and mesenchymal lineages in pulmonary fibrosis*. Science Advances, 2020. **6**(28).
15. Okuda, K., et al., *Secretory Cells Dominate Airway CFTR Expression and Function in Human Airway Superficial Epithelia*. Am J Respir Crit Care Med, 2021. **203**(10): p. 1275-1289.
16. Grizzle, W.E., W.C. Bell, and K.C. Sexton, *Issues in collecting, processing and storing human tissues and associated information to support biomedical research*. Cancer Biomarkers, 2011. **9**(1-6): p. 531-549.

17. Scudellari, M., *Cryopreservation aims to engineer novel ways to freeze, store, and thaw organs*. Proceedings of the National Academy of Sciences of the United States of America, 2017. **114**(50): p. 13060-13062.
18. Chen, W.N., et al., *A comparison of methods accounting for batch effects in differential expression analysis of UMI count based single cell RNA sequencing*. Computational and Structural Biotechnology Journal, 2020. **18**: p. 861-873.
19. Rosenberg, M.E., *Cell-based therapies in kidney disease*. Kidney International Supplements, 2013. **3**(4): p. 364-367.
20. Patschan, D., et al., *Cell-Based Therapies in Acute Kidney Injury (AKI)*. Kidney & Blood Pressure Research, 2018. **43**(3): p. 673-681.
21. Wong, C.Y., *Current advances of stem cell-based therapy for kidney diseases*. World Journal of Stem Cells, 2021. **13**(7): p. 914-933.
22. Luo, Y., *Cell-based therapy for stroke*. Journal of Neural Transmission, 2011. **118**(1): p. 61-74.
23. Mondoro, T.H., P.J. Henslee-Downey, and C.M. Peterson, *NHLBI plans for the promise of cell-based therapies*. Cytotherapy, 2005. **7**(4): p. 317-327.
24. Gennai, S., et al., *Cell-Based therapy for traumatic brain injury*. British Journal of Anaesthesia, 2015. **115**(2): p. 203-212.
25. Scibona, E. and M. Morbidelli, *Expansion processes for cell-based therapies*. Biotechnology Advances, 2019. **37**(8).
26. Wens, I., et al., *Made to Measure: Patient-Tailored Treatment of Multiple Sclerosis Using Cell-Based Therapies*. International Journal of Molecular Sciences, 2021. **22**(14).
27. Wang, J., et al., *Stem Cell-Based Therapies for Liver Diseases: An Overview and Update*. Tissue Engineering and Regenerative Medicine, 2019. **16**(2): p. 107-118.
28. Schaar, B., et al., *Cell-based immunotherapy in gynecologic malignancies*. Current Opinion in Obstetrics & Gynecology, 2019. **31**(1): p. 43-48.
29. Enns, G.M. and M.T. Millan, *Cell-based therapies for metabolic liver disease*. Molecular Genetics and Metabolism, 2008. **95**(1-2): p. 3-10.
30. Hossein-Khannazer, N., et al., *Novel cell-based therapies in inflammatory bowel diseases: the established concept, promising results*. Human Cell, 2021. **34**(5): p. 1289-1300.
31. Negishi, T., et al., *Cryopreservation of brain tissue for primary culture*. Experimental Animals, 2002. **51**(4): p. 383-390.
32. Griesenbach, U. and E. Alton, *Progress in Gene and Cell Therapy for Cystic Fibrosis Lung Disease*. Current Pharmaceutical Design, 2012. **18**(5): p. 642-662.
33. Weiss, D.J., *Stem cells and cell therapies for cystic fibrosis and other lung diseases*. Pulmonary Pharmacology & Therapeutics, 2008. **21**(4): p. 588-594.
34. Fahy, G.M., B. Wowk, and J. Wu, *Cryopreservation of complex systems: The missing link in the regenerative medicine supply chain*. Rejuvenation Research, 2006. **9**(2): p. 279-291.
35. Ratcliffe, E., et al., *Current status and perspectives on stem cell-based therapies undergoing clinical trials for regenerative medicine: case studies*. British Medical Bulletin, 2013. **108**(1): p. 73-94.

36. Golchin, A., et al., *Regenerative Medicine: Injectable Cell-Based Therapeutics and Approved Products*, in *Cell Biology and Translational Medicine, Vol 7: Stem Cells and Therapy: Emerging Approaches*, K. Turksen, Editor. 2020. p. 75-95.
37. Mukherjee, S., G. Yadav, and R. Kumar, *Recent trends in stem cell-based therapies and applications of artificial intelligence in regenerative medicine*. *World Journal of Stem Cells*, 2021. **13**(6): p. 521-541.
38. Schulman, I.H., et al., *Clinical Research Skills Development Program in Cell-Based Regenerative Medicine*. *Stem Cells Translational Medicine*, 2015. **4**(2): p. 118-122.
39. Konda, B., et al., *Isolation and Enrichment of Human Lung Epithelial Progenitor Cells for Organoid Culture*. *Jove-Journal of Visualized Experiments*, 2020(161).
40. Yao, C.F., et al., *Senescence of Alveolar Type 2 Cells Drives Progressive Pulmonary Fibrosis*. *American Journal of Respiratory and Critical Care Medicine*, 2021. **203**(6): p. 707-717.
41. Gonzalez, R.F., et al., *HTII-280, a Biomarker Specific to the Apical Plasma Membrane of Human Lung Alveolar Type II Cells*. *Journal of Histochemistry & Cytochemistry*, 2010. **58**(10): p. 891-901.
42. Yao, C., G. Carraro, and B.R. Stripp, *In vitro Explant Cultures to Interrogate Signaling Pathways that Regulate Mouse Lung Development*. *Bio-protocol*, 2018. **8**(10): p. e2852.

## Supplemental data:

| <b>Table 1: Cell Isolation</b>       |                          |                       |                             |
|--------------------------------------|--------------------------|-----------------------|-----------------------------|
| <b>Reagent</b>                       | <b>Company</b>           | <b>Catalog number</b> |                             |
| 10 mL Sterile syringes, Luer-Lok Tip | Fisher scientific        | BD 309646             |                             |
| 30 mL Sterile syringes, Luer-Lok Tip | VWR                      | BD302832              |                             |
| Biohazard bags                       | VWR                      | 89495-440             |                             |
| Biohazard bags                       | VWR                      | 89495-440             |                             |
| connecting ring                      | Pluriselect              | 41-50000-03           |                             |
| Deoxyribonuclease (lot#SLBF7798V)    | sigma Aldrich            | DN25-1G               |                             |
| Disposable Petri dishes              | Corning/Falcon           | 25373-187             |                             |
| Funnel                               | Pluriselect              | 42-50000              |                             |
| HBSS                                 | Corning                  | 21-023                |                             |
| Liberase™ TM Research Grade          | sigma Aldrich            | 5401127001            |                             |
| Elastase                             | Worthington Biochemical  | LS0022800             |                             |
| needle 16G                           | VWR                      | 305198                |                             |
| needle 18G                           | VWR                      | 305199                |                             |
| PluriStrainer 100 µm (Cell Strainer) | Pluriselect              | 43-50100-51           |                             |
| PluriStrainer 300 µm (Cell Strainer) | Pluriselect              | 43-50300-03           |                             |
| PluriStrainer 40 µm (Cell Strainer)  | Pluriselect              | 43-50040-51           |                             |
| PluriStrainer 500 µm (Cell Strainer) | Pluriselect              | 43-50500-03           |                             |
| PluriStrainer 70 µm (Cell Strainer)  | Pluriselect              | 43-50070-51           |                             |
| Razor blades                         | VWR                      | 55411-050             |                             |
| Red Blood Cell lysis buffer          | eBioscience              | 00-4333-57            |                             |
| <b>Equipment's</b>                   |                          |                       |                             |
| GentleMACS C Tubes                   | MACS Miltenyi Biotec     | 130-096-334           |                             |
| GentleMACS Octo Dissociator          | MACS Miltenyi Biotec     | 130-095-937           |                             |
| Leica ASP 300s Tissue processor      |                          |                       |                             |
| LS Columns                           | MACS Miltenyi Biotec     | 130-042-401           |                             |
| MACS MultiStand**                    | Miltenyi Biotec          | 130-042-303           |                             |
| Thermomixer                          | Eppendorf                | 05-412-503            |                             |
| Thermomixer                          | Eppendorf                | 05-412-503            |                             |
| <b>Table 2: FACS Buffer</b>          |                          |                       |                             |
| <b>Name of Material/Equipment</b>    | <b>Company</b>           | <b>Catalog Number</b> | <b>Comments/Description</b> |
| Amphotericin B                       | Thermo fisher scientific | 15290018              | 2ml                         |
| EDTA (0.5 M), pH 8.0, RNase-free     | Thermo fisher scientific | AM9260G               | 500µl                       |

|                                                                 |                          |                       |                                   |
|-----------------------------------------------------------------|--------------------------|-----------------------|-----------------------------------|
| Fetal Bovine Serum                                              | Gemini Bio-Products      | 100-106               | 10ml                              |
| HBSS Hank's Balanced Salt Solution 1X<br>500 ml                 | VWR                      | 45000-456             | 500ml bottle                      |
| HEPES (1 M)                                                     | Thermo fisher scientific | 15630080              | 5ml                               |
| Penicillin-Streptomycin-Neomycin<br>(PSN) Antibiotic Mixture    | Thermo fisher scientific | 15640055              | 5ml                               |
| <b>Table 3: List of antibodies for FACS</b>                     |                          |                       |                                   |
| <b>Name of Material/Equipment</b>                               | <b>Company</b>           | <b>Catalog Number</b> | <b>Comments/Description</b>       |
| Alexa Fluor® 647 anti-human CD326<br>(EpCAM) Antibody           | BioLegend                | 369820                | 1:50                              |
| BD CompBead Anti-Mouse Ig, K/<br>Negative control particles set | Fisher Scientific        | BDB552843             |                                   |
| CD31 MicroBead Kit, human                                       | Miltenyi Biotec          | 130-091-935           | 20µl/ 10 <sup>7</sup> total cells |
| CD45 MicroBeads, human                                          | Miltenyi Biotec          | 130-045-801           | 20µl/ 10 <sup>7</sup> total cells |
| DAPI                                                            | Sigma Aldrich            | D9542-10MG            | 1:10000                           |
| FITC anti-human CD235a                                          | BioLegend                | 349104                | 1:100                             |
| FITC anti-human CD31                                            | BioLegend                | 303104                | 1:100                             |
| FITC anti-human CD45                                            | BioLegend                | 304054                | 1:100                             |
| FITC anti-mouse IgM Antibody                                    | BioLegend                | 406506                | 1:500                             |
| Mouse IgM anti human HT2-280                                    | Terrace Biotech          | TB-27AHT2-280         | 1:300                             |
| PE anti-human CD271(NGFR)                                       | BioLegend                | 345106                | 1:50                              |
| <b>Table 4: Composition of Organoid Culture mediums</b>         |                          |                       |                                   |
| <b>Name of Material/Equipment</b>                               | <b>Company</b>           | <b>Catalog Number</b> | <b>Comments/Description</b>       |
| MRC-5                                                           | ATCC                     | CCL-171               |                                   |
| PneumaCult -ALI Medium                                          | Stemcell Technologies    | 5001                  |                                   |
| Small Airway Epithelial Cell Growth<br>Medium                   | PromoCell                | C-21170               |                                   |
| ThinCert™ Tissue Culture Inserts,<br>Sterile                    | Greiner Bio-One          | 662641                |                                   |
| Y-27632 (ROCK inhibitor) 100mM stock<br>(1000x)                 | Stemcell Technologies    | 72302                 |                                   |
| Gentamicin solution                                             | Millipore sigma          | G1397                 |                                   |
| <b>Table 5: List of antibodies for Immunohistochemistry</b>     |                          |                       |                                   |
| <b>Name of Material/Equipment</b>                               | <b>Company</b>           | <b>Catalog Number</b> | <b>Comments/Description</b>       |



|                                                     |                   |               |                            |
|-----------------------------------------------------|-------------------|---------------|----------------------------|
| Antigen unmasking solution, citric acid based       | Vector            | H-3300        | 937 $\mu$ l in 100ml water |
| Histogel                                            | Thermo Scientific | HG-4000-012   |                            |
| <b>Primary Antibodies</b>                           |                   |               |                            |
| Anti HT2-280                                        | Terracebiotech    | TB-27AHT2-280 | 1:500                      |
| <b>Secondary Antibodies</b>                         |                   |               |                            |
| FITC anti-mouse IgM Antibody                        | BioLegend         | 406506        | 1:500                      |
| <b>Table 6: Buffers</b>                             |                   |               |                            |
| <b>Immunohistochemistry Blocking Solution</b>       |                   |               |                            |
| 3% BSA, 0.4% Triton-x100 in TBS (Tris based saline) |                   |               |                            |
| <b>Immunohistochemistry Incubation Solution</b>     |                   |               |                            |
| 3% BSA, .1% Triton-X100 in TBS                      |                   |               |                            |
| <b>Immunohistochemistry Washing Solution</b>        |                   |               |                            |
| TBS with 0.1% Tween 20                              |                   |               |                            |

**Supplemental Data:  
Mouse Lung:**

**Isolation of cells from Mouse Lung.**

**1. Mouse lung isolation.**

Mice were placed in a surgical plane by I.P. injection of Ketamine (100 mg/kg) and Xylazine (10 mg/kg) and exsanguinated by dissection of the aorta. Lungs were deflated by nicking the diaphragm and a catheter (20G) inserted into the trachea. Lungs were lavaged three times with 1 ml ice-cold PBS. Lung tissue was then removed from the thorax and immersed in ice cold PBS. Mouse lung epithelial cells were isolated as previously described, and summarized below. [42].

**2. Mouse Lung tissue dissociation.**

Lung tissue was suspended in PBS at 37 °C and inflated with Hams F12 medium containing elastase (4 U/ml). Additional Hams F12/Elastase was introduced every 5 minutes for a total incubation time of 20 minutes. Lung tissue was minced in a petri dish to yield lung fragments of <1mm, and further enzymatically digested by the addition of Liberase TM (0.25 Wünsch U/ml) in HBSS at 37 °C for 60 min. The digested tissue was then passed through a 70  $\mu$ m strainer, resuspended in HBSS-FACS buffer and centrifuged at 400 g for

5 mins at 4°C. Next the pellet was resuspended in 1ml of Red Blood Cell (RBC) lysis buffer and incubated for 1.5 mins with gentle agitation at RT, and then passed through a 70 µm strainer. Finally, cells were centrifuged at 400 g for 5 mins at 4°C and resuspended in HBSS-FACS buffer.

### **3. Depletion of immune and endothelial populations.**

Microbeads for immune (CD45) and endothelial (CD31) cell removal (10 µl each), were added to 90 µl of HBSS-FACS buffer containing  $10^7$  total cells. After a 15-20 mins incubation at 4 °C, cells were washed in HBSS-FACS buffer and centrifuged at 300xg for 5 mins. A LS Column, placed in the magnetic field of a MACS Separator, was primed by rinsing with 3 mL of HBSS-FACS buffer, then the cell suspension was added onto the column, and effluent unlabeled cells were collected and used for FACS.

### **4. Cell Surface staining for FACS.**

Per each  $1 \times 10^7$  cells in 1 mL of HBSS+ buffer, primary antibodies were added at the required concentration and incubated for 30 mins at 4 °C. (See antibody details in table 3). Next, cell were washed in HBSS+ buffer and centrifuged at 600 x g for 5 mins at 4°C. Finally, before proceeding to FACS, cells were filtered through a strainer to ensure single cell suspension, and DAPI (1µg/mL) was added to stain for dead cells.

## **Supplemental Figures:**

**Supplemental Figure 1: Gating strategy for mouse lung epithelial cell fractionation.** Representative image showing the comparison between FACS plots of CD31<sup>-</sup>/CD45<sup>-</sup>/CD326<sup>+</sup> population from fresh tissue (A), cryobanked frozen tissue (B) and cryobanked single cell suspension (C) from a single mouse lung.

**Supplemental Figure 2: Gating strategy for human lung epithelial cell fractionation:** Representative image showing the comparison between FACS plots of CD31<sup>-</sup>/CD45<sup>-</sup>/CD326<sup>+</sup>/HTII-280<sup>+</sup> population from fresh distal tissue (A), cryobanked frozen distal tissue (B) and cryobanked single cell suspension from distal tissue(C) from a single biological sample of human distal lung.

**Supplemental Figure 3:** Sorted cells were stained for HTII-280 (green), SPC (red) and nuclei (blue). Scale bar = 50 µm.

Figure:1 Schematic Representation of Isolation of Cells from Human and Mouse Lung.

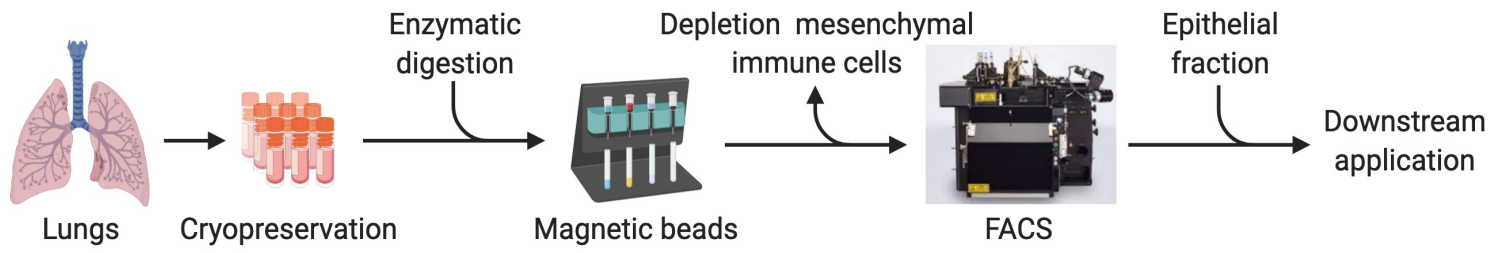

**Figure:2 Representative Sorting Strategy for Mouse Lung Cells and Organoids**

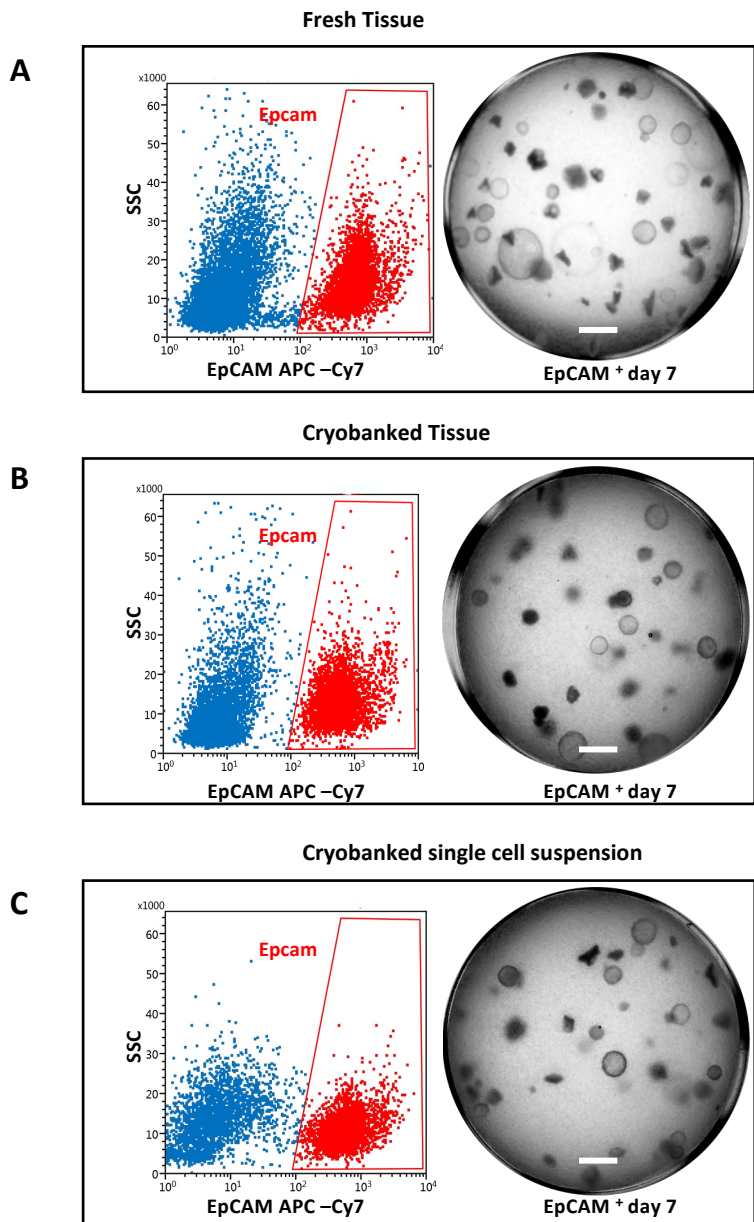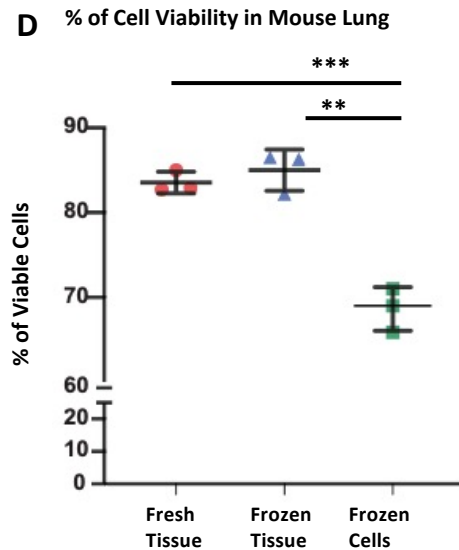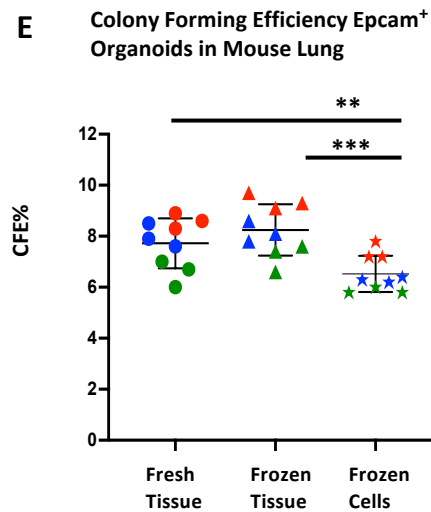

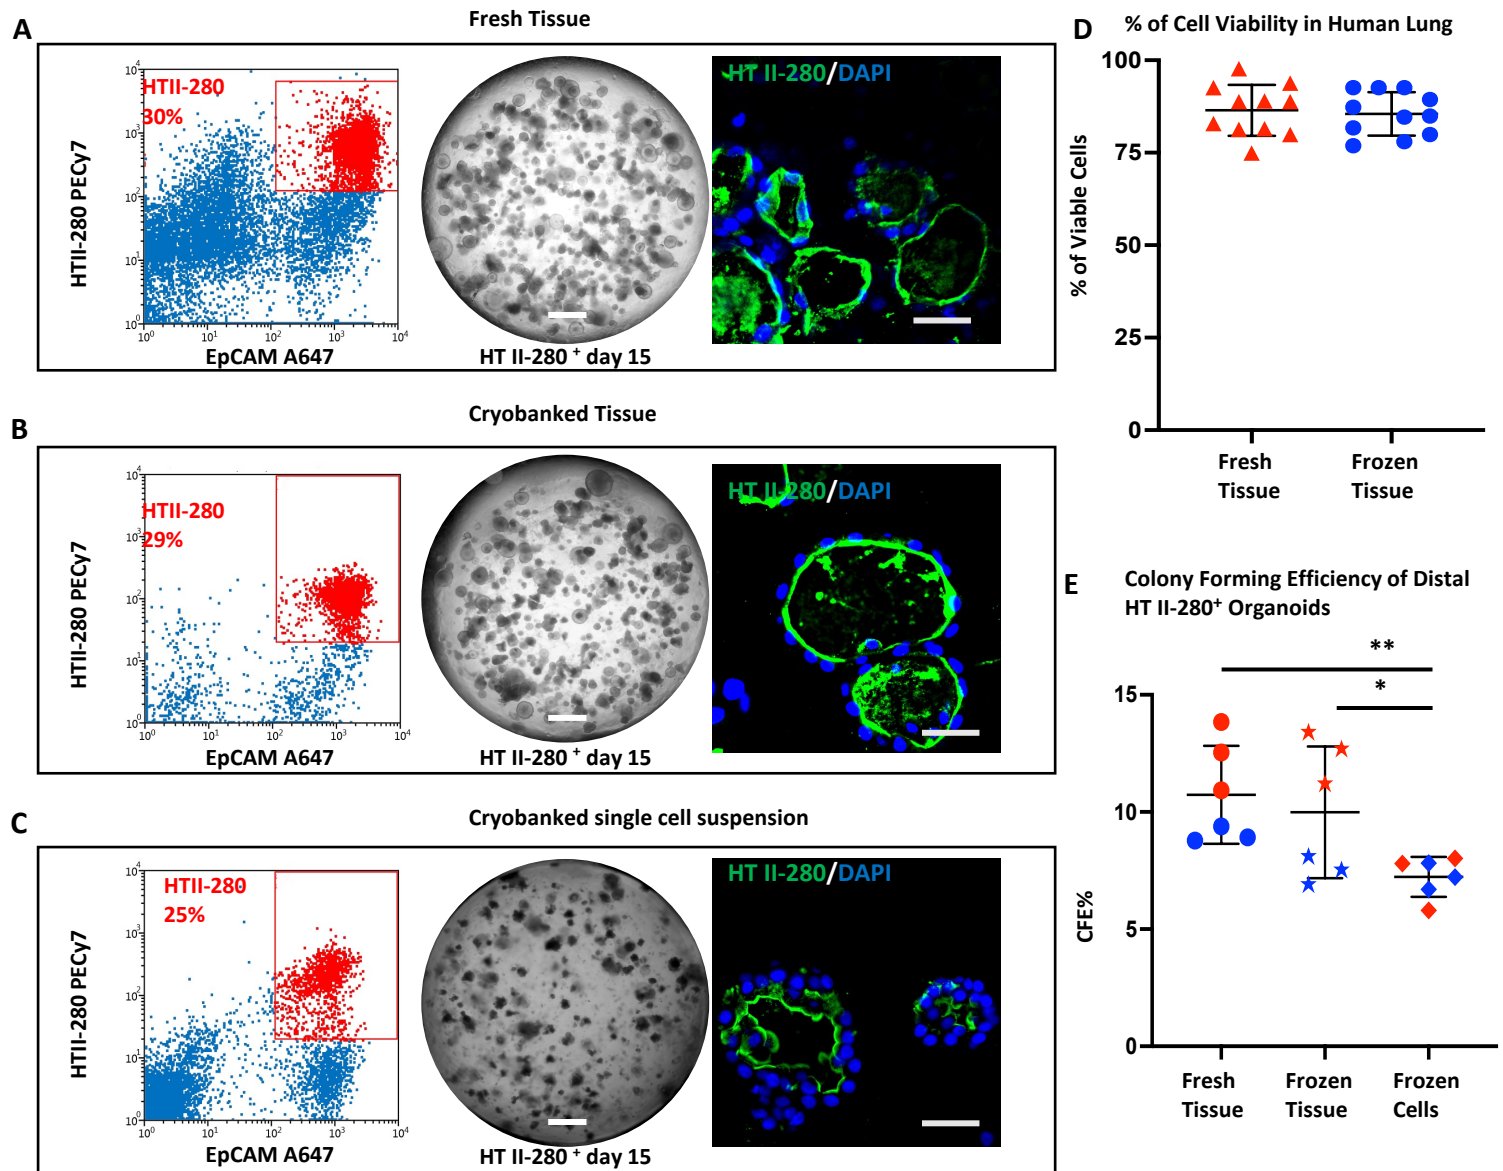

**Figure:3 Representative Sorting Strategy for Human Distal Lung Cells and Characterization of Distal Lung Organoids**

**Figure 4 Single Cell Transcriptome of Human Distal Lung Epithelial Cells.**

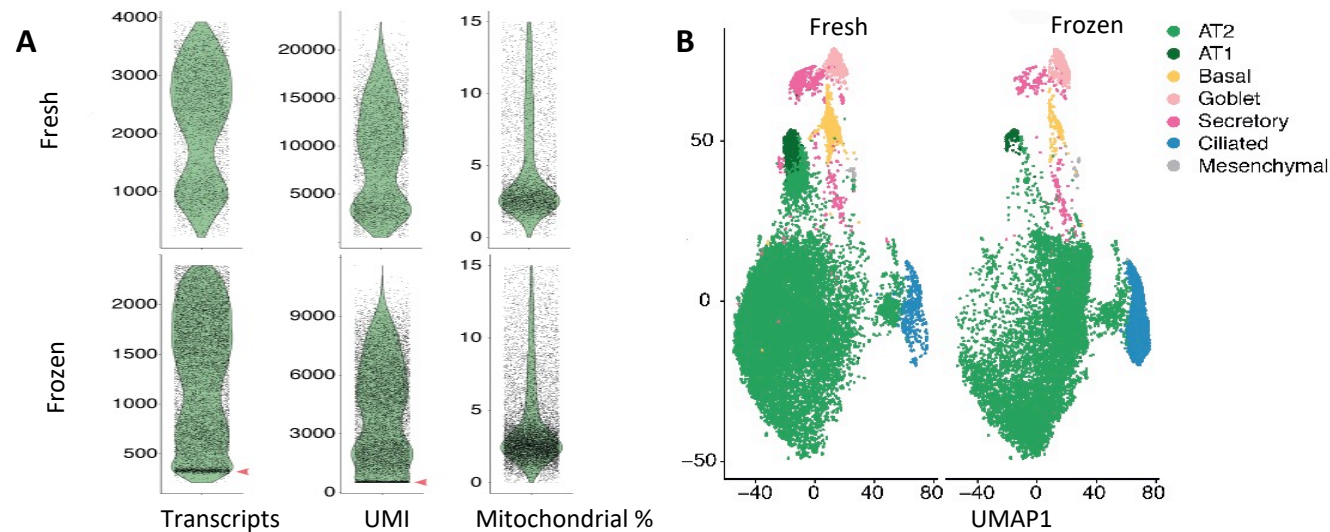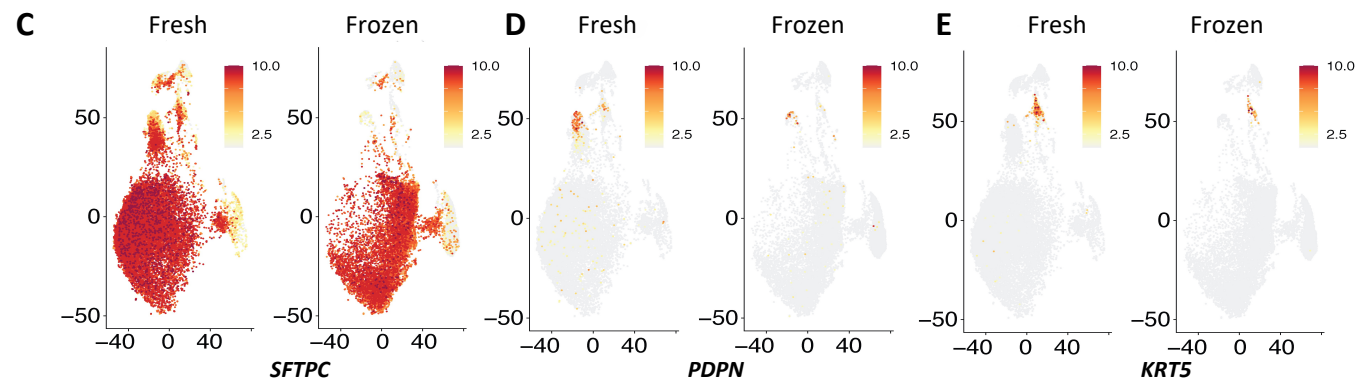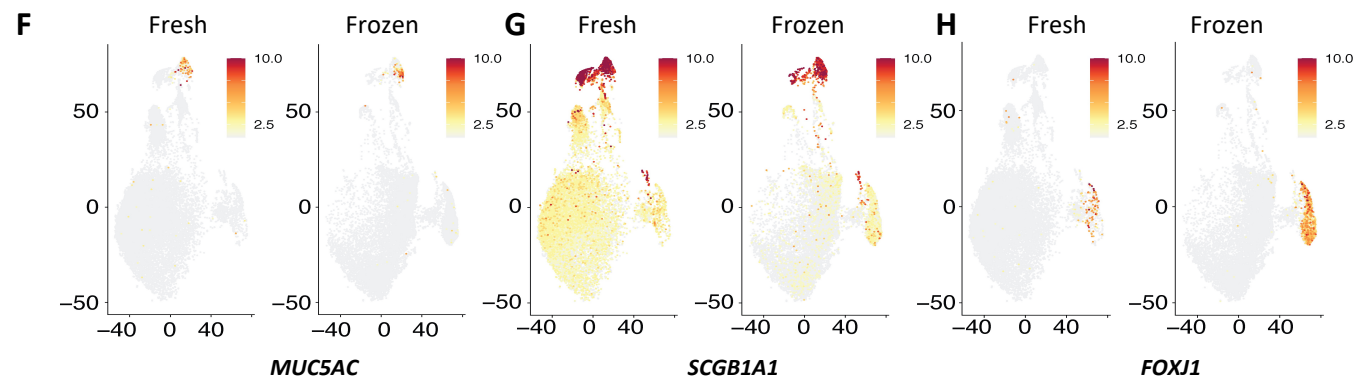

Mouse Fresh Lung Tissue

A

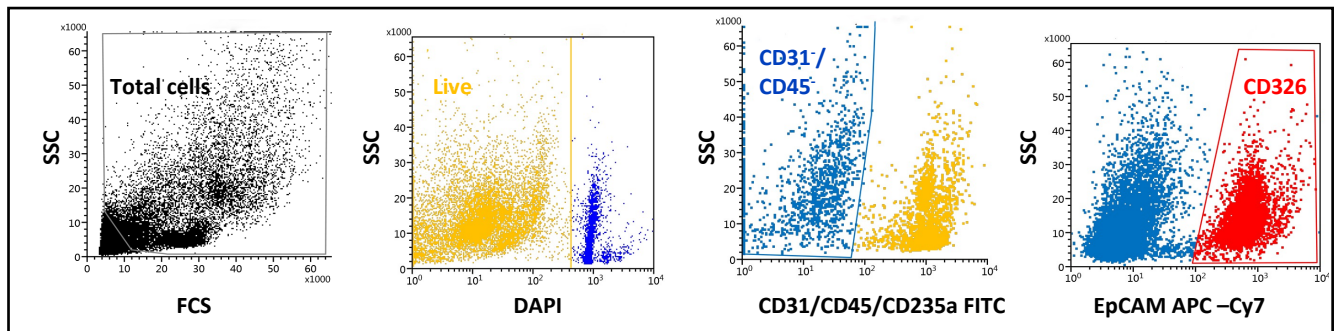

B

Mouse Frozen Lung Tissue

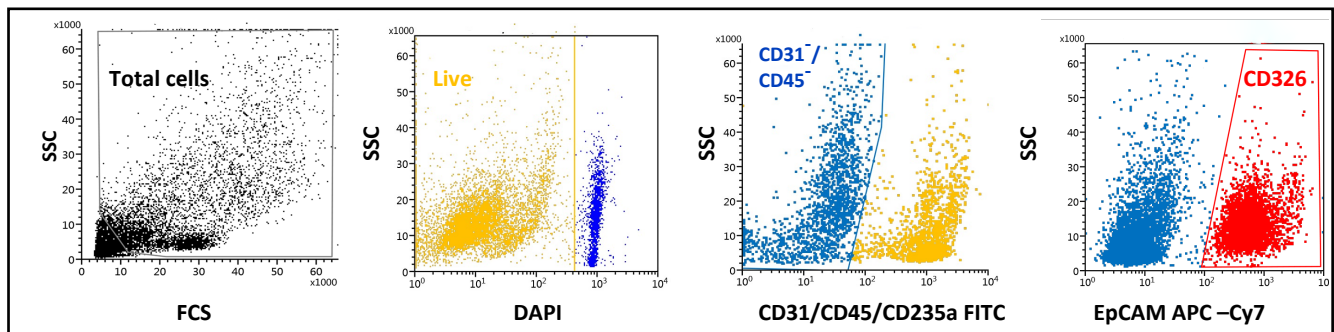

C

Mouse Frozen cells

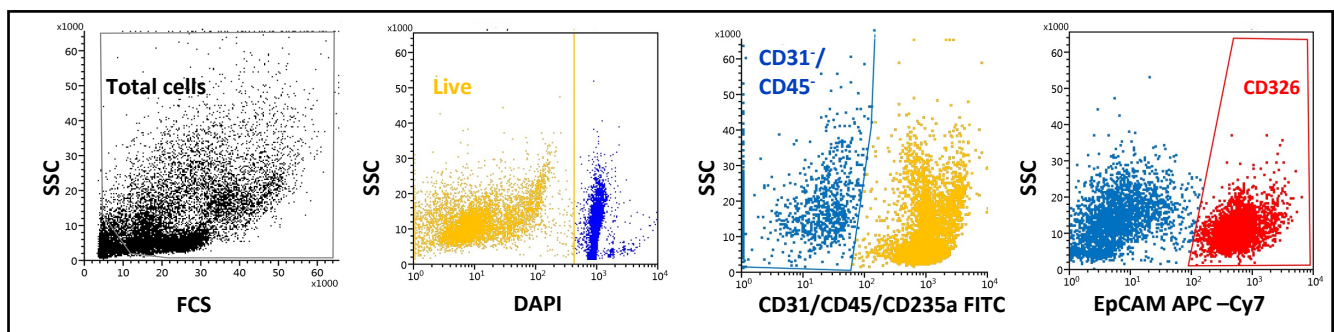

Supplemental Figure:1  
Figure:1 Representative Sorting Strategy for Mouse Lung Cells and Organoids

### Distal Fresh Tissue

A

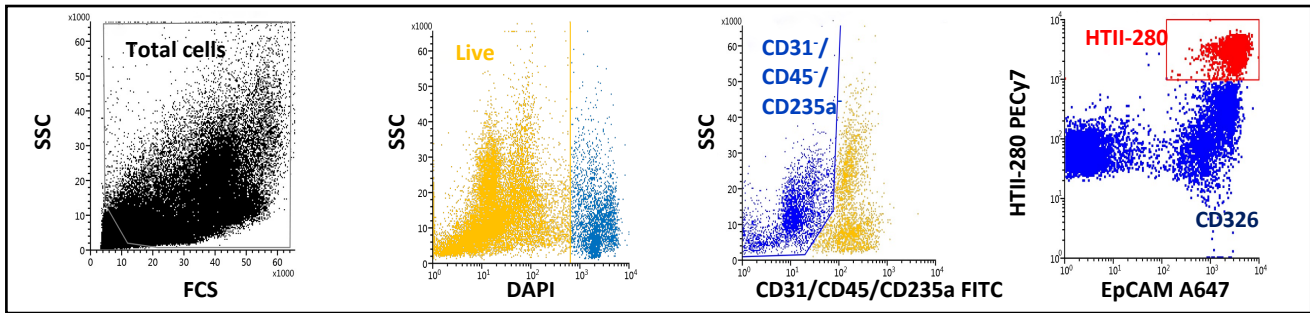

### Distal Frozen Tissue

B

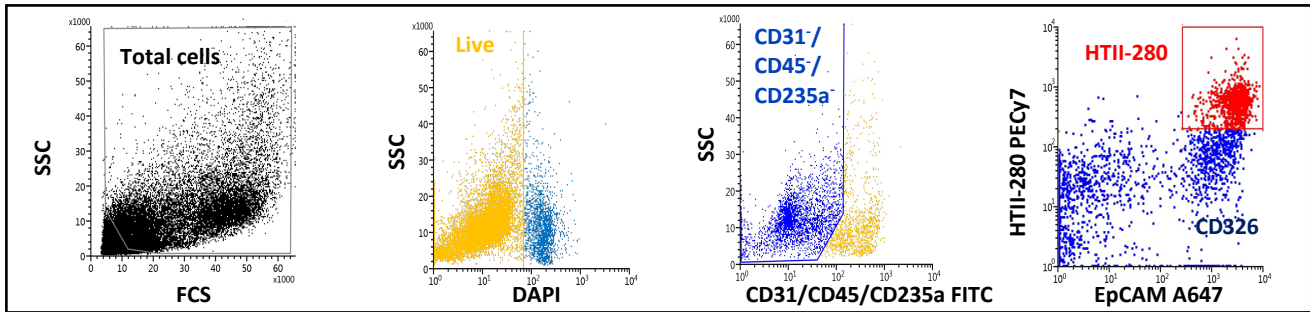

### Distal Frozen cells

C

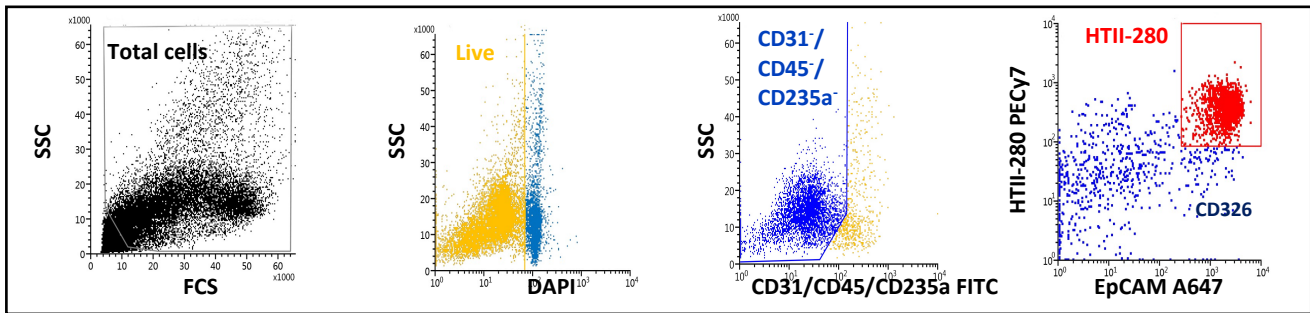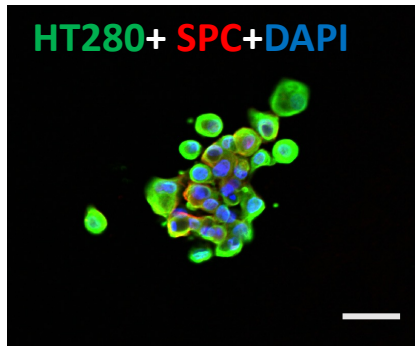

### Supplemental Figure:2

Figure 2: Representative Sorting Strategy for Human Distal Lung Cells and Characterization of Distal Lung Organoids

### Supplemental Figure:3

Figure3: Sorted cells were stained for HT II 280 and SPC
